# Supplementary material
Source: PubMed Central journal article supplement (PMC2890771)
Supplement: 1006545107_pnas.201006545SI.pdf [file 1006545107_pnas.201006545SI.pdf]

# Supporting Information

Stadinski et al. 10.1073/pnas.1006545107

|                                                         |                                   |                                |                          |
|---------------------------------------------------------|-----------------------------------|--------------------------------|--------------------------|
| <b>IA<sup>97</sup> Insulin B:11–20(19A) Register #1</b> |                                   |                                |                          |
| Leader                                                  | Peptide                           | Linker                         | IA <sup>97</sup> β-chain |
| PGTEGQ                                                  | <b>LR</b> <u>EALYLV</u> <b>AE</b> | QAGGGS <del>LV</del> PRGSGGGGS | ERHFVHQFK                |
| <b>IA<sup>97</sup> Insulin B:12–21(19A) Register #2</b> |                                   |                                |                          |
| Leader                                                  | Peptide                           | Linker                         | IA <sup>97</sup> β-chain |
| PGTEGQ                                                  | <b>VR</b> <u>ALYLV</u> <b>AGE</b> | QAGGGS <del>LV</del> PRGSGGGGS | ERHFVHQFK                |
| <b>IA<sup>97</sup> Insulin B:13–22(19A) Register #3</b> |                                   |                                |                          |
| Leader                                                  | Peptide                           | Linker                         | IA <sup>97</sup> β-chain |
| PGTEGQ                                                  | <b>ER</b> <u>LYLV</u> <b>AGEE</b> | QAGGGS <del>LV</del> PRGSGGGGS | ERHFVHQFK                |
| <b>IA<sup>97</sup> Insulin B:14–23(19A) Register #4</b> |                                   |                                |                          |
| Leader                                                  | Peptide                           | Linker                         | IA <sup>97</sup> β-chain |
| PGTEGQ                                                  | <b>AR</b> <u>YLV</u> <b>AGERE</b> | QAGGGS <del>LV</del> PRGSGGGGS | ERHFVHQFK                |

**Fig. S1.** Baculovirus constructions for optimizing registers 1–4. Amino acid sequences (bold letters) of insulin B-chain analog minimal peptides are shown in the context of the baculovirus constructions. The sequence (nonbolded letters) of the linker attaching the peptide to the N-terminal end the IA<sup>97</sup> β-chain is also shown as well as the C-terminal end of the leader peptide. The substitutions of p1R/p9E are shown in red. The change of B19Cys to Ala is underlined. In all four constructs, a Gln was added to the end of the leader peptide to ensure proper signal peptidase cleavage at the preceding Gly.

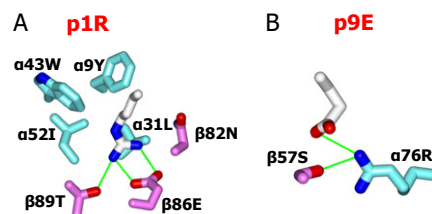

**Fig. S2.** Optimal amino acids for the p1 and p9 pockets of IA<sup>97</sup>. (A) Details of the p1 pocket of IA<sup>97</sup> with a bound HEL11-25 peptide (PDB ID code 1FJ3). The side chain of an Arg at p1 of the HEL peptide is shown filling the pocket with its guanidinium group forming a salt bridge to β86Glu of IA<sup>97</sup>. (B) Details of the p9 pocket of IA<sup>97</sup> with a bound GAD207-220 peptide (PDB ID code 1ES0). The side chain of glutamic acid at p9 of the GAD peptide is shown filling the pocket making a salt bridge α76Arg, which is unique to IA<sup>97</sup>.

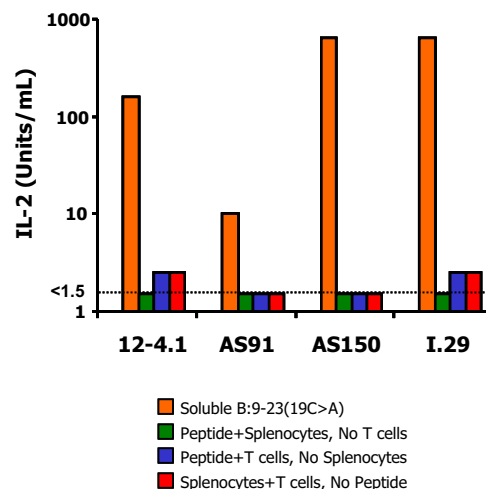

**Fig. S3.** Four B:9–23 reactive T cells tolerate a Cys-to-Ala substitution at insulin B19. Four anti-insulin (B:9–23) reactive T-cell hybridomas respond to soluble insulin B:9–23(C19A). The BDC 12-4.1, AS91, AS150, and I.29 T-cell hybridomas were stimulated with the insulin B:9–23 or the insulin B:9–23(C19A) peptide (50 μg/mL) along with NOD spleen cells (1 × 10<sup>6</sup>/well). Stimulation was assessed by the production of IL-2 determined by an HT-2 bioassay. Results are the average from duplicate wells from one experiment.

**A - IA<sup>97</sup> w/ Insulin B:12-23 "Register Trapped" Minimal Epitopes**

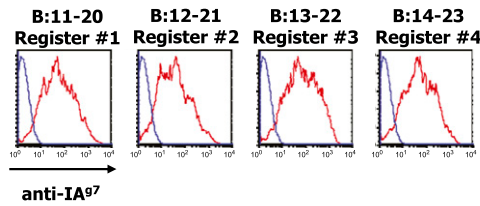

**B - IA<sup>97</sup> w/ Insulin B:10-23 "Register Trapped" Peptides**

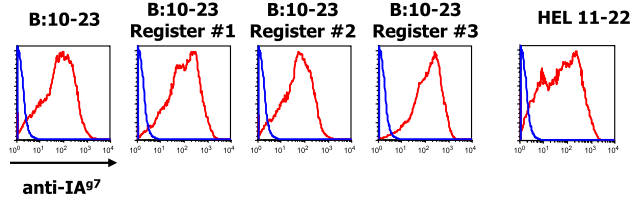

**C - IA<sup>97</sup> w/ Insulin B:10-23 Disulfide Bonded Register #3 "Trapped" Peptides**

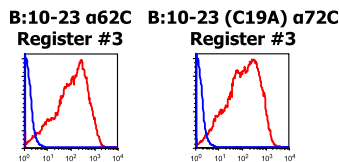

**Fig. S4.** All of the IA<sup>97</sup> complexes containing various versions of insulin peptides express well on the surface of infected insect cells. Sf9 insect cells expressing the various IA<sup>97</sup>-linked peptide complexes were stained with anti-IA<sup>97</sup> Ab (OX6-PE). Surface expression was evaluated by flow cytometry comparing infected insect cells (red) to uninfected insect cells (blue). (A) Minimum (B:12–23) epitopes for the 12-4.1 T cell. (B) Extended (B:10–23) epitopes. (C) Extended epitopes with engineered disulfides.

| T cell            | TCR Chain | TCR V Region |         | TCR J Region |            | CDR3     |       |              |
|-------------------|-----------|--------------|---------|--------------|------------|----------|-------|--------------|
|                   |           | Arden        | IMGT    | IMGT         | V          | Junction | J     |              |
| <b>BDC 12-4.1</b> | α         | Vα13         | AV13S1  | TRAV5D-4     | TRAJ53*01  | CAAS     | SGA   | NSGGSNYKLTFG |
|                   | β         | Vβ2          | BV2S1   | TRBV1        | TRBJ2-7*01 | CTCS     | PGLGK | EQYFG        |
| <b>AS91</b>       | α         | Vα13         | -       | TRAV5-1      | TRAJ31*01  | CS       | RGN   | NNRIFFG      |
|                   | β         | Vβ1          | BV6S1A1 | TRBV5        | TRBJ2-5*01 | CASS     | QLGGL | DTQYFG       |
| <b>AS150</b>      | α         | Vα10         | AV10S8  | TRAV13-1     | TRAJ22*01  | CAI      |       | SSGSWQLIFG   |
|                   | β         | Vβ2          | BV2S1   | TRBV1        | TRBJ1-6*01 | CTCS     | ADQ   | NSYNSPLYFA   |
| <b>I.29</b>       | α         | Vα15         | AV15S1  | TRAV10       | TRAJ53*01  | CAAS     | PS    | NSGGSNYKLTFG |
|                   | β         | Vβ2          | BV2S1   | TRBV1        | TRBJ2-7*01 | CTCS     | AGLG  | YEQYFG       |

**Fig. S5.** The TCRs expressed by four independent anti-insulin B:9–23-specific T cells. cDNA was prepared from four independent insulin B-chain-responsive T-cell hybridomas and used as template in a PCR with Vα- and Vβ-specific 5' primers and either a Cα or Cβ 3' primer. The PCR fragment was sequenced to determine the Vα/Jα or Vβ/Jβ gene segments used as well as the sequence of the Vα and Vβ CDR3 loops. Shown are the common Vα and Vβ names as well as the genes used as defined by both the Arden et al. (1) and ImMunoGeneTics (IMGT) (2) nomenclatures. The TCR J region segments are shown using the IMGT nomenclature.

- Arden B, Clark SP, Kabelitz D, Mak TW (1995) Mouse T-cell receptor variable gene segment families. *Immunogenetics* 42:501–530.
- Giudicelli V, et al. (2006) IMGT/LIGM-DB, the IMGT comprehensive database of immunoglobulin and T cell receptor nucleotide sequences. *Nucleic Acids Res* 34(Database issue): D781–D784.

|                                                                |                        |                           |                          |
|----------------------------------------------------------------|------------------------|---------------------------|--------------------------|
| <b>IA<sup>97</sup> HEL 11–22</b>                               |                        |                           |                          |
| Leader                                                         | Peptide                | Linker                    | IA <sup>97</sup> β-chain |
| PGTEG                                                          | <b>MKRHGLDNRYGY</b>    | AGGGGSLVPRGSGGGGS         | ERHFVHQFK                |
| <b>IA<sup>97</sup> Insulin B:10-23</b>                         |                        |                           |                          |
| Leader                                                         | Peptide                | Linker                    | IA <sup>97</sup> β-chain |
| PGTEG                                                          | <b>HLVEALYLVCGERG</b>  | AGGGGSLVPRGSGGGGS         | ERHFVHQFK                |
| <b>IA<sup>97</sup> Insulin B:10–23 Register #1</b>             |                        |                           |                          |
| Leader                                                         | Peptide                | Linker                    | IA <sup>97</sup> β-chain |
| PGTEG                                                          | <b>HLREALYLVCEERG</b>  | AGGGGSLVPRGSGGGGS         | ERHFVHQFK                |
| <b>IA<sup>97</sup> Insulin B:10–23 Register #2</b>             |                        |                           |                          |
| Leader                                                         | Peptide                | Linker                    | IA <sup>97</sup> β-chain |
| PGTEG                                                          | <b>HLVREALYLVCGERG</b> | AGGGGSLVPRGSGGGGS         | ERHFVHQFK                |
| <b>IA<sup>97</sup> Insulin B:10–23 Register #3</b>             |                        |                           |                          |
| Leader                                                         | Peptide                | Linker                    | IA <sup>97</sup> β-chain |
| PGTEG                                                          | <b>HLVERLYLVCGEEG</b>  | AGGGGSLVPRGSGGGGS         | ERHFVHQFK                |
| <b>IA<sup>97</sup> Insulin B:10–23 19A Register #3 P11 Cys</b> |                        |                           |                          |
| Leader                                                         | Peptide                | Linker                    | IA <sup>97</sup> β-chain |
| PGTEG                                                          | <b>HLVERLYLVAGEEG</b>  | <u>C</u> GGGGSLVPRGSGGGGS | ERHFVHQFK                |

**Fig. S6.** Amino acid sequences (bold letters) of the hen egg lysozyme (HEL) 11–22 peptide and N-terminally extended insulin B-chain peptides are shown in the context of the baculovirus constructions. The sequences of the C-terminal end of the signal peptide and the linker attaching the peptide to the N-terminal end of the IA<sup>97</sup> β-chain are also shown. The substitutions to create p1R/p9E are shown in red. In the last construct a change of B19Cys (position p6) to Ala is underlined, and the Cys replacing the Ala at the first position of the linker (equivalent to peptide p11, orange).
